# Supplementary material for: “Nano-filter”-integrated AIMS with machine learning: direct exhaled breath analysis for lung cancer screening
Source: Royal Society of Chemistry journal article supplement (doi:10.1039/d6sc02074g), 2026-06-12
Supplement: d6sc02074g1.pdf [file d6sc02074g1.pdf]

## Electronic Supplementary Information

### “Nano-Filter”- Integrated AIMS with Machine Learning: Direct Exhaled Breath Analysis for Lung Cancer Screening

Weiqing Wang,<sup>[a]+</sup> Yue Tang,<sup>[a]+</sup> Zhenqiang Zhang,<sup>[c]</sup> Wenxiao Wu,<sup>[b]</sup> Yuanzhu Jiang,<sup>[d]</sup> Wenjun Wang,<sup>[b]</sup> Junzheng Meng,<sup>[d]</sup> Zhenzhen Chen,<sup>[a]</sup> Weifeng Li,<sup>[c]</sup> Yanmei Yang,<sup>\*[a]</sup> Yuguang Chen,<sup>\*[b]</sup> and Bo Tang<sup>\*[a,e]</sup>

---

[a] Dr. W. Q. Wang, Prof. Z. Z. Chen, Prof. Y. M. Yang, Prof. B. Tang  
College of Chemistry, Chemical Engineering and Materials Science, Key Laboratory of Molecular and Nano Probes, Ministry of Education  
Shandong Normal University  
Jinan, 250014, P.R. China.  
E-mail: tangb@sdsu.edu.cn; yym@sdsu.edu.cn

[b] Dr. Y. Tang, W. X. Wu, W. J. Wang, Prof. Y. G. Chen\*  
Department of Emergency Medicine, Shandong Provincial Clinical Research Center for Emergency and Critical Care Medicine  
Qilu Hospital of Shandong University  
Jinan, 250014, P.R. China.  
E-mail: chen919085@sdu.edu.cn

[c] Z. Q. Zhang, Prof. W. F. Li  
School of Physics  
Shandong University  
Jinan, 250100, P.R. China.

[d] Dr. Y. Z. Jiang, J. Z. Meng,  
Provincial Hospital Affiliated to Shandong First Medical University  
Shandong Provincial Hospital  
Jinan, 250021, P. R. China.

[e] Prof. B. Tang  
Laoshan Laboratory  
Qingdao 266237, P. R. China.

[+] These authors contributed equally to this work.

## Table of Contents

|                               |    |
|-------------------------------|----|
| Experimental Procedures ..... | 3  |
| Results and Discussion.....   | 6  |
| References .....              | 20 |
| Author Contributions .....    | 20 |

## Experimental Procedures

### Materials and Reagents

All chemicals used in this work were of analytical grade and used without further purification. Water used in all experiments was doubly distilled and purified by a Milli-Q system. Ethyl acetate ( $\geq 96.0\%$ ), sodium sulfate anhydrous ( $\geq 98.0\%$ ,  $\text{Na}_2\text{SO}_4$ ), sodium chloride ( $\geq 98.0\%$ ,  $\text{NaCl}$ ), ethylene glycol ( $\geq 99.8\%$ ,  $\text{C}_2\text{H}_6\text{O}_2$ ), silver nitrate ( $\geq 99.8\%$ ,  $\text{AgNO}_3$ ) and chloroauric acid ( $\geq 99.8\%$ ,  $\text{HAuCl}_4$ ) were purchased from Sinopharm Chemical Reagent Co., Ltd. (Shanghai). *p*-bromobenzoyl hydrazine ( $\geq 99.9\%$ ,  $\text{C}_7\text{H}_7\text{BrN}_2\text{O}$ ) was purchased from Macklin (Shanghai). Selenourea (99.9%,  $\text{CH}_4\text{N}_2\text{Se}$ ) was purchased from Alfa Aesar (Shanghai). Polyvinylpyrrolidone (Average molecular weight: 58000,  $(\text{C}_6\text{H}_9\text{NO})_n$ , PVP), trisodium citrate (99.6%,  $\text{Na}_3\text{C}_6\text{H}_5\text{O}_7$ ) and 4-aminothiophenol ( $\geq 99.0\%$ ,  $\text{C}_6\text{H}_7\text{NS}$ ) were purchased from Aladdin Biochemical Technology Co., Ltd. (Shanghai). Absolute alcohol ( $\geq 99.5\%$ ,  $\text{C}_4\text{H}_8\text{O}_2$ ) was obtained from Yuandong Fine Chemical Co., Ltd. (Shandong Province, China).

Acetonitrile ( $\geq 99.7\%$ ), dichloromethane ( $\geq 99.9\%$ ), *n*-hexane ( $\geq 97.0\%$ ), isopropyl alcohol ( $\geq 99.9\%$ ), methanol ( $\geq 99.9\%$ , MeOH), ethanol ( $\geq 99.9\%$ ), ethyl acetate ( $\geq 99.9\%$ ), enanthol ( $\geq 99.7\%$ ) and acetone ( $\geq 99.9\%$ ) used in MS detection were HPLC grade and brought from Shandong Yuwang and Tianxia New Material Co., Ltd. (Shandong Province, China).

Valeraldehyde (98%,  $\text{C}_5\text{H}_{10}\text{O}$ , Val), glutathione (98%, GSH) and cysteine ( $\geq 99.9\%$ , Cys) were brought from Energy Chemical Co., Ltd. (Anhui Province, China). Benzaldehyde (99%,  $\text{C}_7\text{H}_6\text{O}$ , Ben) was brought from HEOWNS Biochem Technologies LLC (Tianjin, China). 4-hydroxy-2-nonenal (98%,  $\text{C}_9\text{H}_{16}\text{O}_2$ , 4-HNE) was purchased from Absin Biological Technology Co., Ltd. (Shanghai, China). *N*-Benzylidenebenzylamine (98%, internal standard, IS) were obtained from Macklin Technology Co., Ltd (Shanghai, China).

The fiber paper was obtained from KIMTECHTM. 1.00 mL, 2.00 mL and 20.0 mL syringes were bought from Conley Medical Devices (Hunan Province, China). Aluminum foil gas sampling bags (hereinafter referred to as sampling bags) were bought from BKMANLAB (Changde, Hunan Province). Confined-cavity (SN01030559850-00), syringe (500  $\mu\text{L}$ ) and capillary tube were obtained from Thermo Scientific (San Jose, CA).

### Instruments

Q-Exactive Orbitrap (QE, Thermo Scientific, San Jose, CA) in positive ion mode was used to record signals. MS/MS ion scans were generated through collision-induced dissociation (CID). The voltage of the capillary and tube lens was set to +30 V. The temperature of the capillary was 320°C, and the sheath gas pressure was set to zero. MS/MS ion scans were generated through collision-induced dissociation (CID). Normalized collision energy (NCE) of 35 - 70 eV (arbitrary manufacturer's unit on the QE) was applied to achieve sufficient fragmentation of the samples. QE was operated in a selected ion monitoring (SIM) mode. CID MS/MS mode with the acquisition time of 1 min. Absorption and fluorescence spectra were recorded using a UV-2600 visible spectrophotometer (Shimadzu, Japan). X-ray photoelectron spectroscopy (XPS) spectra were obtained using a Phoebos 100 electron analyzer (SPECS GmbH) equipped with 5 channeltrons using an unmonochromated Mg K $\alpha$  X-ray source (1253.6 eV). All pH measurements were performed with a FE28 pH Meter (METTLER TOLEDO, Shanghai, China) with a combined glasscalomel electrode. The scanning electron microscopy (SEM) images were recorded by JEOL JSM-6700F SEM. Transmission electron microscopy (TEM) images were recorded using a JEM-2100 microscope (JEOL, Japan).  $^1\text{H}$  NMR and  $^{13}\text{C}$  NMR spectra were recorded by Bruker Advance 400 MHz spectrometers (Bruker, Germany).

### Synthesis of *p*-selenophenylhydrazide (HSe probe)

The synthesis process of *p*-selenophenylhydrazide (HSe probe) was improved based on the previous steps of synthesizing 4-aminobenzene-seleno<sup>[1]</sup>: 1.20 mmol of *p*-bromobenzoyl hydrazine was added to selenourea solution (1.32 mmol in 3.00 mL absolute ethanol) and refluxed for 2 h. The product HSe probe was collected by filtration, washed with water (50.0 mL) and used directly with not further purification (The yield was determined to be 70.12%).  $^1\text{H}$  NMR (400 MHz,  $\text{DMSO}-d_6$ )  $\delta$  9.86 (s, 1H), 7.80 - 7.72 (m, 2H), 7.72 - 7.62 (m, 2H), 4.52 (s, 2H).  $^{13}\text{C}$  NMR (101 MHz,  $\text{DMSO}-d_6$ )  $\delta$  164.90, 132.42, 131.37, 129.08, 124.79. HRMS (ESI): calculated for  $\text{C}_7\text{H}_8\text{N}_2\text{OSe}$  ( $[\text{M}+\text{H}]^+$ ) 216.9802, found 216.9804.

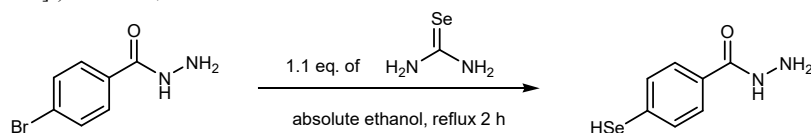

Fig. S1 Synthesis process of HSe probe.

### Synthesis of Ag NPs

The alcohol reduction method is used to synthesize Ag NPs with slight modification<sup>[2]</sup>, 0.500 g PVP was added to 40.0 mL ethylene glycol at 47°C. After PVP was totally dissolved, 10.0 mg  $\text{AgNO}_3$  was added and meanwhile the reaction flask was covered with aluminum foil. After  $\text{AgNO}_3$  was dissolved completely, the solution was heated to 130°C and stirred for 1 h. The reaction mixture was stirred and cooled down to room temperature. The obtained Ag NPs was washed by acetone for three times and stored in MeOH (40.0 mL,  $1.47 \times 10^{-3}$  mM).

### Synthesis of Au NPs

Au NPs were synthesized according to previous report<sup>[3]</sup>. In detail, 94.0 mL aqueous solution of  $\text{HAuCl}_4$  (2.00 mM) was stirred and heated until vigorous boiling, then 19.0 mL trisodium citrate solution (38.8 mM) was added. The mixture was kept boiling until the color of the solution changed from yellow to wine red. This reaction was terminated when the suspension cooled down to room temperature. The synthesized AuNPs was stored in aqueous solution ( $6.00 \times 10^{-5}$  mM) and stored at 4°C, and concentrated to  $1.47 \times 10^{-3}$  mM before use.

### Synthesis of HSe-Ag NPs

200  $\mu\text{L}$  MeOH solution containing Ag NPs ( $1.47 \times 10^{-3}$  mM) was stored in a brown glass bottle. Then 0.210 mg HSe probe in 1.00 mL MeOH was added and stirred for 1 h at room temperature. Then, the mixture was centrifuged at 15000 rpm for 15 min at 4°C. The precipitate was collected and washed by MeOH for three times to remove the excess HSe Probe.

### Preparation of HS-Ag NPs, HSe-Au NPs and HS-Au NPs nanomaterials

For HS-Ag NPs, 200  $\mu\text{L}$  MeOH solution containing Ag NPs ( $1.47 \times 10^{-3}$  mM) was stored in a brown glass bottle. Then 0.130 mg 4-aminothiophenol in 1.00 mL MeOH was added and stirred for 1 h at room temperature. The subsequent processing steps were the same as the preparation of HSe-Ag NPs. The synthesis of HSe-Au NPs is the same as HSe-Ag NPs. The preparation of HS-Au NPs is the same as HS-Ag NPs.

### Preparation of gaseous aldehyde

Take Ben as an example, a 100 mL sampling bag was first pre-filled with a specific volume of air (about one-third of the bag volume) using a peristaltic pump. Then, 100  $\mu$ L of a Ben/MeOH solution ( $9.4 \times 10^{-2}$  nM) was injected into the bag using a 1.00 mL disposable syringe. The sampling bag was then stored at 37°C for 3 h to allow equilibration of Ben vapor.

### Preparation of nano-fiber paper

A rectangular fiber paper ( $1.20 \times 1.50$  cm) was rolled up and placed into the reaction cavity. Then HSe-Ag NPs in MeOH (10.0  $\mu$ L, 1.00 mM) were added to the fiber paper. The reaction cavity was fixed on a glass rod. During detection, 20.0 mL gas (gaseous Ben or multiple aldehydes or EB samples) from sampling bag was injected into the cavity by a syringe. The operations of extracting 20.0 mL gas can be seen in Video S2.

### EB samples collection

Totally 120 EB samples from volunteers were collected, including 60 healthy samples and 60 lung cancer (LCa). Before collection, drink or eat were not allowed for the volunteers for up to 3 h. The volunteers had to take three deep breaths followed by immediate sampling collection using aluminum sampling bags (300 mL). This study was approved by the Scientific Research Ethics Committee of Qilu Hospital of Shandong University (Project Number: KYLL-202312-015)

### Mass spectrometry analysis

All the MS analysis were carried out in full mass scan mode or SIM mode with QE, under positive ion mode. The optimal NCE for collision-induced dissociation was 45 - 60 eV. Raw data were exported from *Xcalibur* software (*Thermo Scientific*, San Jose, CA) for further analysis.

### Quantification of aldehydes

Gaseous aldehydes (Val, Ben and 4-HNE) with different concentrations (5.00 ppt, 10.0 ppt, 20.0 ppt, 50.0 ppt, 100 ppt, 200 ppt) were prepared in sampling bags. All the gaseous aldehydes were injected into the confined-cavity, followed by supplying with spray solvent MeOH and isopropanol alcohol ( $V_{\text{MeOH}}: V_{\text{Isopropanol alcohol}}=3:1$ ) which contained IS (the concentration is 100 ppt). The average MS peak area ratios of aldehyde derivatization products to IS were obtained from 6 rounds of tests for each concentration.

### Recovery and interference experiments

Standard gaseous Ben with known concentrations (8.00 ppt, 15.0 ppt, or 25.0 ppt) were prepared in sampling bags, respectively. The Ben concentrations were determined by “nano-filter” AIMS with six parallel measurements. The recovery (%) was calculated by the formula below:<sup>[3]</sup>

$$\text{Recovery (\%)} = (C_{\text{tested}} - C_{\text{blank}}) / C_{\text{spiked}} \times 100\%$$

Here,  $C_{\text{tested}}$  is the concentration of Ben tested by “nano-filter” AIMS,  $C_{\text{blank}}$  is the concentration of Ben in sampling bag before injection with standard Ben solution.  $C_{\text{spiked}}$  is the final concentration after injection.

The interference experiments were performed as follows: firstly, standard gaseous Ben (the concentration was 100 ppt) was prepared in a sampling bag. Then sulfhydryl small molecule metabolites (SMMs), including Cys (1.00 ppm), GSH (1.00 ppm), acetone (1.00 ppm), were added separately. The mixtures were detected by “nano-filter” AIMS.

### High-fidelity signal reconstruction via machine learning

To address instrumental drift and background noise in non-targeted metabolomics, we developed an end-to-end computational pipeline that combines dynamic signal processing with ML (Fig. S13). During data preprocessing, rather than relying on generic denoising approaches, we applied a resolution-locked dynamic peak picking algorithm ( $R = 70000$ ) designed around the physical properties of the QE. Early scans affected by the solvent front were excluded using a temporal cutoff, removing non-steady-state spectra acquired at retention times shorter than 0.5 min. This step reduced ion suppression and improved signal stability. On the basis of the filtered scans, we implemented a Global Multiplicative Calibration strategy to correct non-linear drift along the mass axis. An IS ( $m/z$  196.11) was used as a spectral reference to derive a scan-specific scaling factor, which was then applied to adjust  $m/z$  values for each retained scan. Compared with conventional linear offset correction, this approach provides finer correction at the individual-scan level. Mass calibration was followed by IS-guided quality control, in which spectra exhibiting internal standard intensities below 1000 were excluded. Together, these procedures eliminated approximately 58.5% of low-quality spectra and yielded a curated set of 3447 high-fidelity scan frames for downstream feature extraction, improving measurement consistency and reproducibility from the outset.

To reduce feature redundancy caused by isotopic envelopes in high-resolution mass spectrometry, we implemented a greedy blackout strategy. The algorithm first selects primary peaks with high signal-to-noise ratios and then searches for associated isotopic clusters ( $M-2$  to  $M+1$ ) within a 0.03 Da mass tolerance. Once an isotopic pattern is identified, the corresponding spectral region is masked to prevent repeated feature extraction from the same metabolite. Feature intensities are subsequently normalized to the internal standard to account for systematic variation, including differences in injection volume. Following feature extraction, we applied a frequency-based aggregation strategy to merge multi-frame data into a single representative profile for each sample. An occupancy filter (>5%) was then applied during this aggregation process, retaining only those features that appeared in at least 5% of the scans within a sample to effectively eliminate transient noise and sporadic artifacts. These steps effectively compress spectra containing tens of thousands of raw signals into a compact, high-confidence feature matrix. Finally, using this refined dataset, we applied a Random Forest-based feature importance screening strategy to select the 500 most informative metabolic features, which were then used to train a robust diagnostic classifier based on the XGBoost<sup>[4]</sup> architecture.

## Results and Discussion

### 1. Characterization of nanomaterials

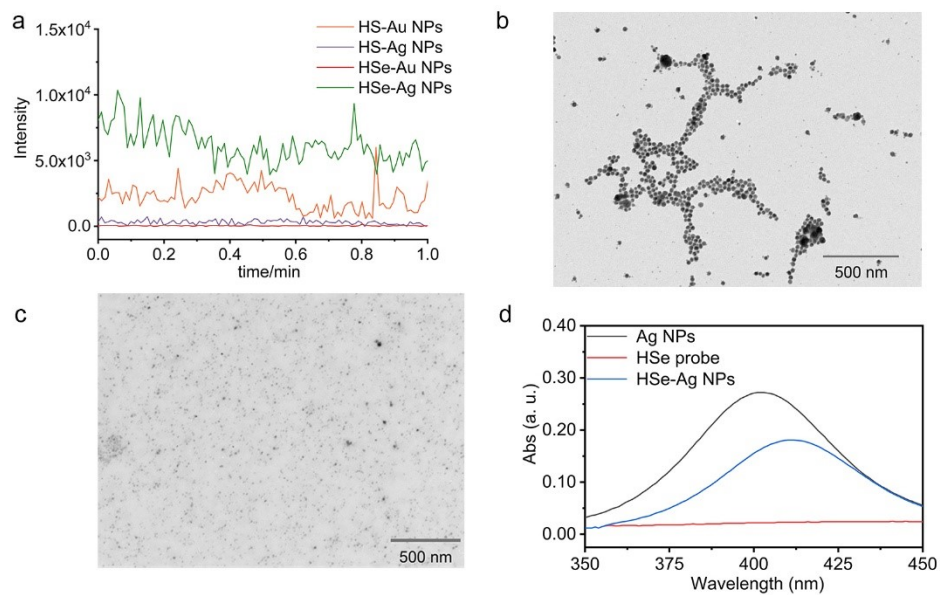

**Fig. S2.** (a) TIC of HSe-Ag NPs, HSe-Au NPs, HS-Ag NPs and HS-Au NPs at 3200 V. TEM images of (b) Ag NPs and (c) HSe-Ag NPs. (d) UV spectra for Ag NPs, HSe probe and HSe-Ag NPs.

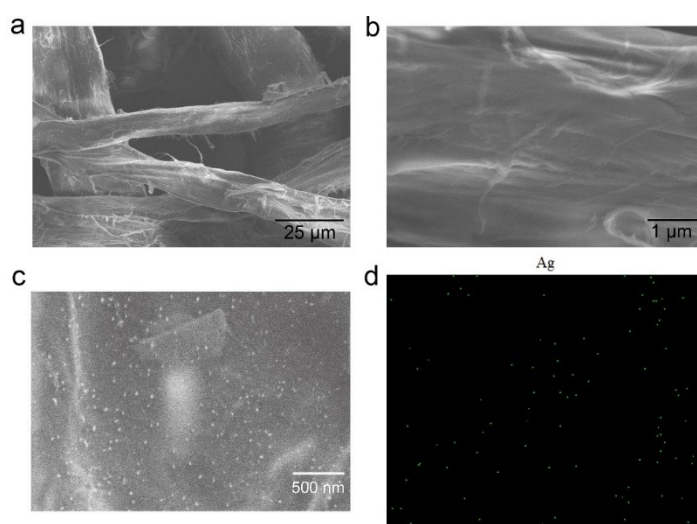

**Fig. S3.** SEM images of (a) fiber paper, (b) enlargement of the fiber paper, (c) HSe-Ag NPs on the fiber paper and (d) the distribution of Ag elements.

## 2. Setup of the “nano-filter” AIMS device

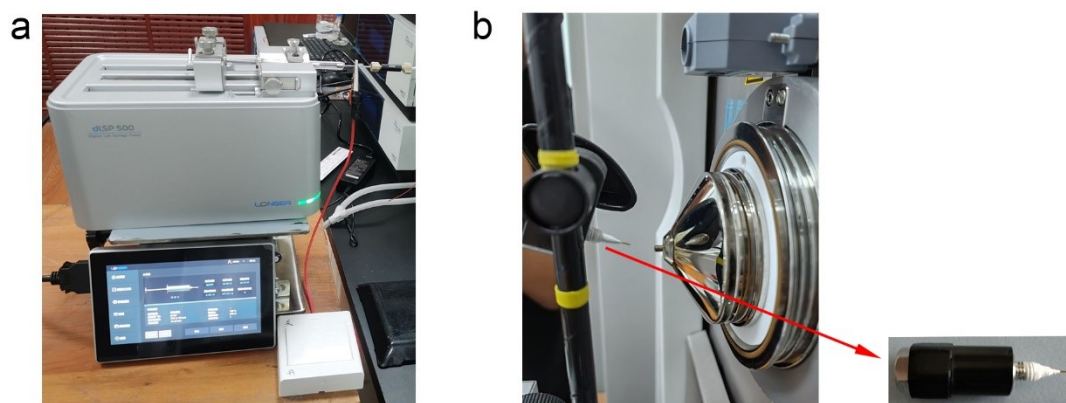

**Fig. S4.** Photos of (a) part of the AIMS platform (a high-voltage switch, an injection pump and an injector connecting confined-cavity part) and (b) the confined-cavity and mass spectrometry inlet.

## 3. Optimization of detecting conditions

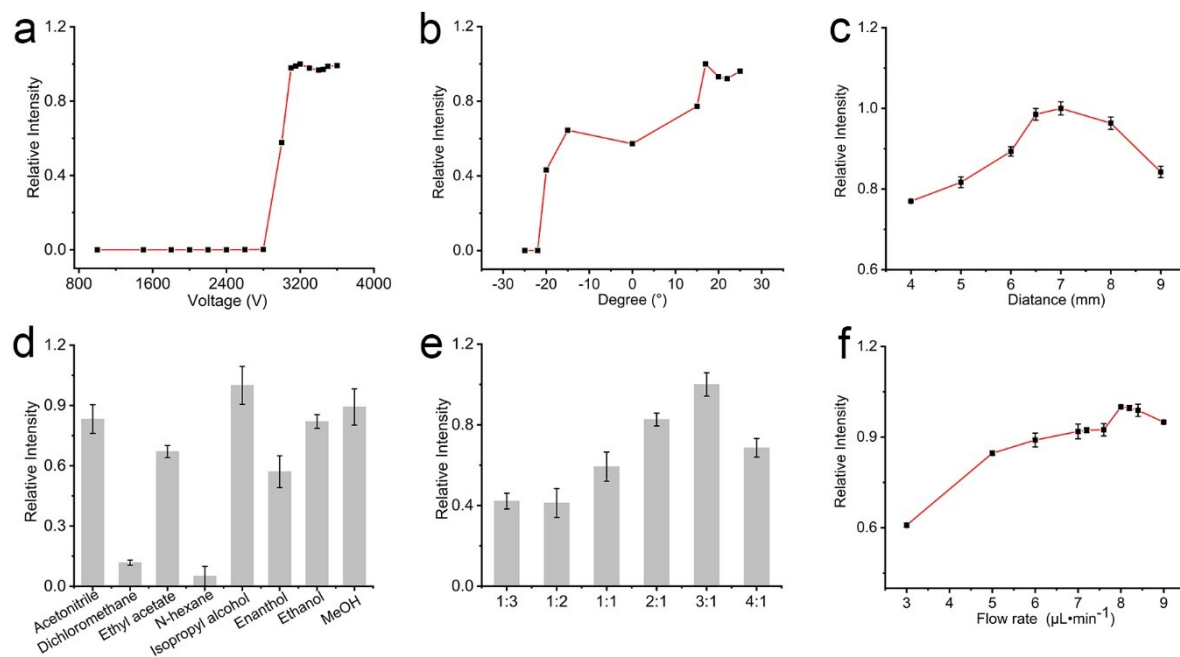

**Fig. S5.** Optimization of experimental conditions. The MS relative intensity with respect to (a) the voltage, (b) the degree between the capillary in the confined-cavity and MS inlet, (c) the distance between the capillary tip and MS-inlet, (d) different spray solvent, (e) the ratio of methanol to isopropyl alcohol and (f) the flow rate of the spray solvent.

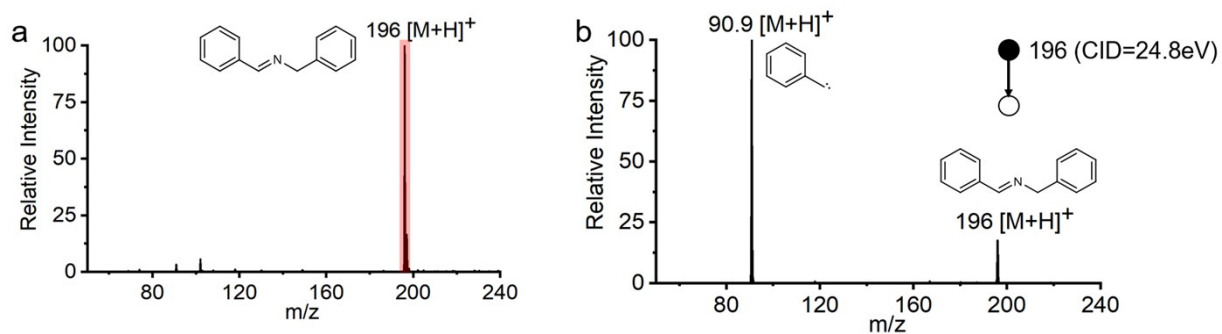

**Fig. S6.** (a) Mass spectrum of IS; (b) CID MS/MS mass spectrum of IS.

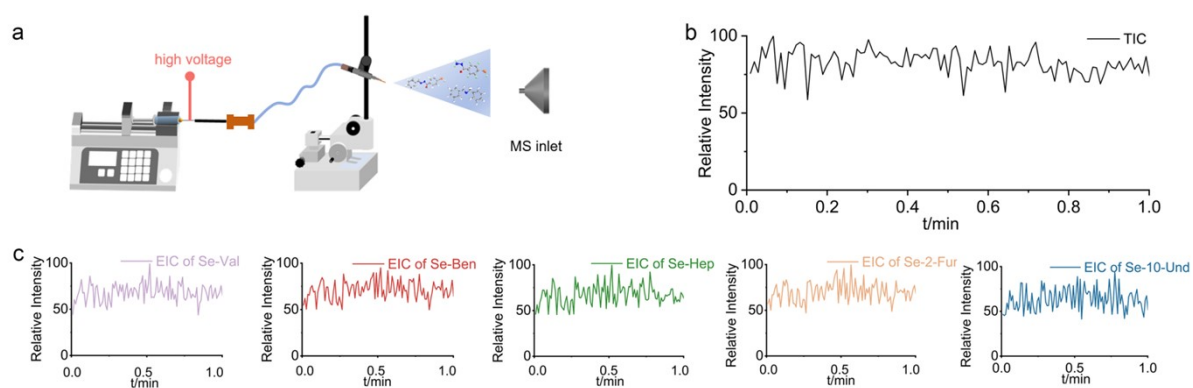

**Fig. S7.** (a) The operation process of “nano-filter” based AIMS. (b) TIC of full MS and (c) EIC of five Se-aldehydes during 1.0 minute detection.

#### 4. Detection of real EB samples

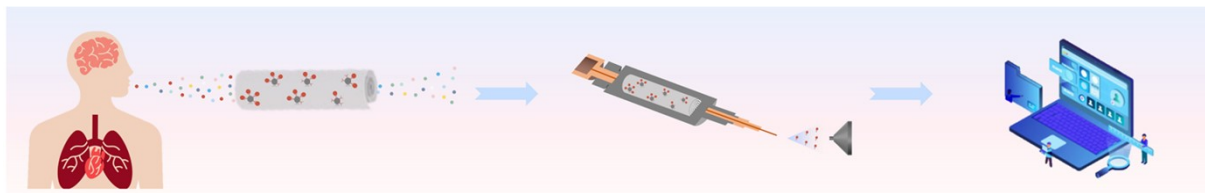

**Fig. S8** Schematic diagram of using “nano-filter” AIMS to detect real EB samples.

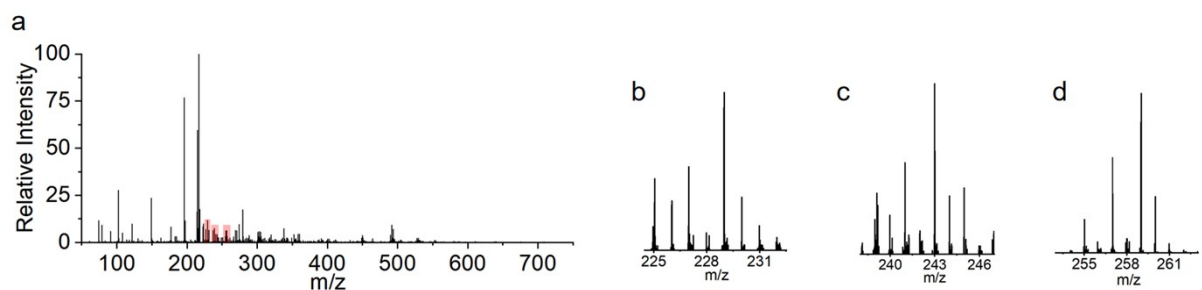

**Fig. S9** (a) Full MS spectrum of one EB sample from healthy volunteer. Enlargement of (b) Se-Methanal, (c) Se-Ethanal and (d) Se-Propanal, respectively.

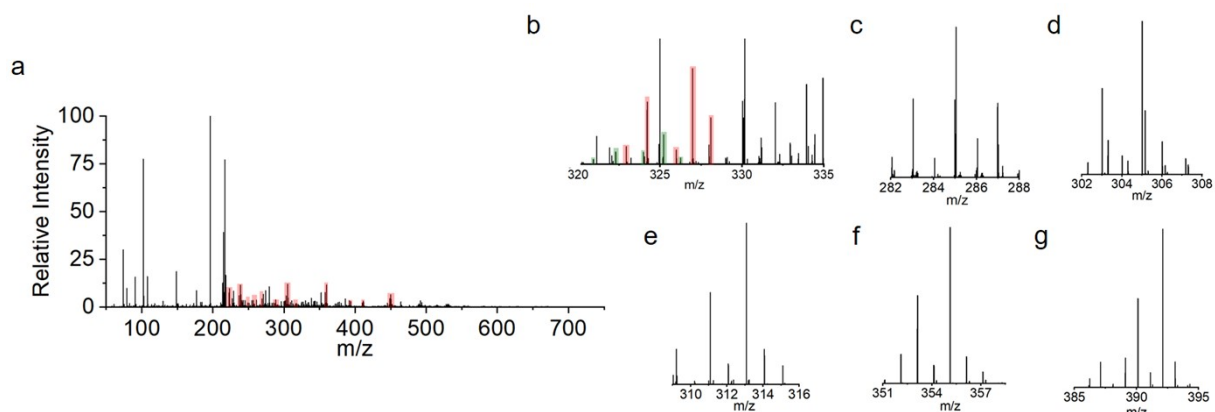

**Fig. S10** (a) Full MS spectra of one EB sample from LCa volunteer. Enlargement of (b) Se-Oct (red) and Se-Octe (green), (c) Se-Val, (d) Se-Ben, (e) Se-Hep, (f) Se-4-HNE and (g) Se-Pent.

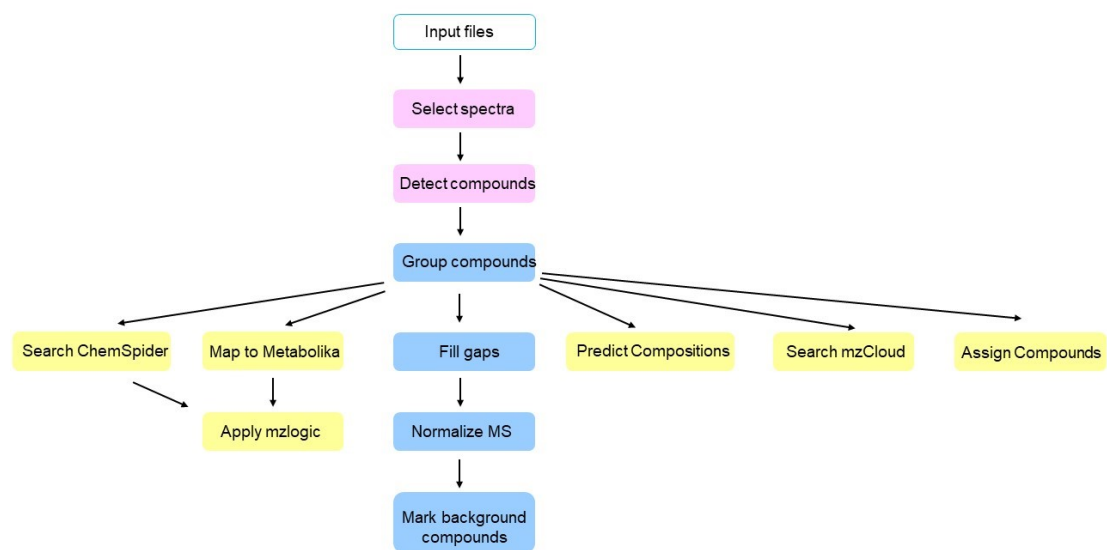

**Fig. S11** The workflow of Compound Discoverer software.

**Table S1.** The abbreviation and ID of 88 aldehydes

| Number (ID) | Name                                             | Abbreviation | Structure                                                                            | Percentage occupied of Healthy (%) | Percentage occupied of LCa (%) |
|-------------|--------------------------------------------------|--------------|--------------------------------------------------------------------------------------|------------------------------------|--------------------------------|
| 1           | formaldehyde                                     | Methanal     |     | 100                                | 100                            |
| 2           | acetaldehyde                                     | Ethanal      |     | 100                                | 100                            |
| 3           | propionic aldehyde                               | Propanal     |     | 100                                | 100                            |
| 4           | valeraldehyde                                    | Val          |     | 98.3                               | 86.7                           |
| 5           | butyraldehyde                                    | Buty         |     | 93.3                               | 86.7                           |
| 6           | benzaldehyde                                     | Ben          |     | 91.7                               | 100                            |
| 7           | 3-aminopropanal                                  | 3-Npro       |    | 83.3                               | 53.3                           |
| 8           | heptaldehyde                                     | Hep          |    | 83.3                               | 100                            |
| 9           | 4-nitrobenzaldehyde                              | p-nitroben   |    | 81.7                               | 63.3                           |
| 10          | nonanaldehyde                                    | Nona         |   | 75.0                               | 60.0                           |
| 11          | decanaldehyde                                    | Dec          |  | 76.7                               | 66.7                           |
| 12          | palmitaldehyde                                   | Pal          |  | 63.3                               | 66.7                           |
| 13          | octanaldehyde                                    | Oct          |  | 60.0                               | 85.0                           |
| 14          | 5-ethylfuran-2-carbaldehyde                      | 5-ethyl      |  | 55.0                               | 61.7                           |
| 15          | hexanal                                          | Hex          |  | 50.0                               | 93.3                           |
| 16          | 2-(5-methyl-5-vinyltetrahydrofuran-2-yl)propanal | 2-Fur-propan |  | NA                                 | 51.7                           |
| 17          | (E)-pent-2-enal                                  | Pente        |  | NA                                 | 50.0                           |
| 18          | 3,4-dihydroxyhex-5-enal                          | 3,4-DH-hexe  |   | NA                                 | 75.0                           |
| 19          | (E)-but-2-enal                                   | Bute         |   | NA                                 | 73.3                           |
| 20          | (Z)-3-(tetrahydrofuran-2-yl)acrylaldehyde        | 3-Fur-acryl  |   | NA                                 | 81.7                           |
| 21          | 2-hydroxybenzaldehyde                            | p-Hben       |   | NA                                 | 80.0                           |

|    |                                                                  |                    |                                                                                      |    |      |
|----|------------------------------------------------------------------|--------------------|--------------------------------------------------------------------------------------|----|------|
| 22 | 4-(prop-1-en-2-yl)cyclohex-1-ene-1-carbaldehyde                  | <i>p</i> -cyc-1-en |     | NA | 63.3 |
| 23 | (E)-3-methyl-4-oxopent-2-enal                                    | 3-M-4-pente        |     | NA | 58.3 |
| 24 | 2-amino-5-oxopentanoic acid                                      | 2-N-5-oxo          |     | NA | 55.0 |
| 25 | 2-(hydroxymethyl)-4-oxobutanoic acid                             | 2-H-4-oxo          |     | NA | 61.7 |
| 26 | 4-hydroxy-2-nonenal                                              | 4-HNE              |    | NA | 93.3 |
| 27 | (Z)-4-hydroxy-3-methylbut-2-enal                                 | 4-H-3-Mbut         |     | NA | 88.3 |
| 28 | (Z)-3-(3-hydroxyphenyl)-2-methylacrylaldehyde                    | 3-H-2-M-bacy       |     | NA | 83.3 |
| 29 | 3-phenylpropyl formate                                           | 3-ph-For           |    | NA | 80.0 |
| 30 | 4-aminobutanal                                                   | 4-Nbut             |    | NA | 76.7 |
| 31 | 4-hydroxy-2-hexenal                                              | 4-HHE              |   | NA | 75.0 |
| 32 | 3-aminobut-3-enal                                                | 3-Nbut-3-en        |   | NA | 70.0 |
| 33 | (S)-2-amino-3-oxopropanoic acid                                  | 2-N-3-oxo          |   | NA | 70.0 |
| 34 | 2-hydroxy-3-oxopropanoic acid                                    | 2-H-3-oxo          |   | NA | 68.3 |
| 35 | 4-((3-aminopropyl)amino)butanal                                  | 4-(3-N)-but        |  | NA | 68.3 |
| 36 | 3,4,5-trihydroxy-2-oxopentanal                                   | TriH-2-oxo         |   | NA | 68.3 |
| 37 | 3,4,5-trimethylbenzaldehyde                                      | Tri-Mben           |   | NA | 68.3 |
| 38 | 2-formamidobenzoic acid                                          | 2-Forben           |   | NA | 68.3 |
| 39 | 5',5'-dimethyl-[1,1'-bi(cyclohexane)]-1',3'-diene-4-carbaldehyde | DM-Den-4-car       |  | NA | 68.3 |
| 40 | (2R,3R,4S)-2,3,4,5-tetrahydroxypentanal                          | Xylose             |  | NA | 61.7 |
| 41 | (E)-3-(3,4-dihydroxy-5-methoxyphenyl)acrylaldehyde               | 3-(DH)acry         |  | NA | 61.7 |
| 42 | 2-benzyl-6-hydroxyheptanal                                       | 2-ben-6-H-hep      |  | NA | 61.7 |

|    |                                                                          |                      |                                                                                      |    |      |
|----|--------------------------------------------------------------------------|----------------------|--------------------------------------------------------------------------------------|----|------|
| 43 | 3-oxododecanal                                                           | 3-odece              | 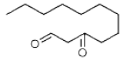    | NA | 60.0 |
| 44 | 5-aminopentanal                                                          | 5-Npen               |    | NA | 58.3 |
| 45 | 2-(4-hydroxy-3-methoxyphenyl)acetaldehyde                                | 2-(2-H-3-M)ace       |    | NA | 58.3 |
| 46 | 2-acetamido-5-oxopentanoic acid                                          | 2-ace-5-oxo          |     | NA | 56.7 |
| 47 | 4-formyl-2-methoxyphenyl isobutyrate                                     | 2-Mphbut             |    | NA | 56.7 |
| 48 | 3-oxotetradecenal                                                        | 3-oxodece            |    | NA | 56.7 |
| 49 | pentadecanal                                                             | Pent                 |    | NA | 56.7 |
| 50 | 2-methylhexadecanal                                                      | 2-Mhexdec            |    | NA | 56.7 |
| 51 | 5-hydroxy-4-(hydroxymethyl)-6-methylnicotinaldehyde                      | 5-H-6-Mlnico         |     | NA | 55.0 |
| 52 | (E)-2-methyl-4-(2,6,6-trimethylcyclohex-1-en-1-yl)but-1-en-1-yl formate  | 2-M-4-tri-1-en-1-for |   | NA | 55.0 |
| 53 | N5-(4-oxobutyl)glutamine                                                 | N-(4-oxo)glu         |  | NA | 53.3 |
| 54 | 2-benzyl-2-hydroxyoctanal                                                | 2-ben-2-Hoct         |   | NA | 53.3 |
| 55 | (R)-2-hydroxypropanal                                                    | 2-Hpro               |   | NA | 51.7 |
| 56 | 3-hydroxy-3-(2-hydroxycyclohexyl)propanal                                | 3-(2-DH)pro          |   | NA | 51.7 |
| 57 | (2S,3R,4R,5R)-2,3,4,5,6-pentahydroxyhexanal                              | D-gulose             |   | NA | 51.7 |
| 58 | (S)-2-acetamido-6-oxohexanoic acid                                       | S-oxo                |   | NA | 51.7 |
| 59 | N-(2-(3-aminopropanoyl)-4-methylphenyl)formamide                         | N-N(M)-for           |   | NA | 51.7 |
| 60 | 10-undecylenal                                                           | 10-Und               |   | NA | 50.0 |
| 61 | undecanal                                                                | Und                  |  | NA | 50.0 |
| 62 | 12-methyltridecanal                                                      | 12-Mtride            |   | NA | 50.0 |
| 63 | 2-(2-hydroxy-4a-methyl-8-methylenedecahydronaphthalen-2-yl)acrylaldehyde | 2-(2-M)-acry         |   | NA | 50.0 |

|    |                                                                    |                  |                                                                                      |      |      |
|----|--------------------------------------------------------------------|------------------|--------------------------------------------------------------------------------------|------|------|
| 64 | (Z)-18-oxooctadec-9-enoic acid                                     | Z-18-oxo         | 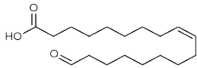   | NA   | 50.0 |
| 65 | 2-methyl-2-(methyldisulfaneyl)propanal                             | 2-M-pro          |     | 88.3 | NA   |
| 66 | 3-(3-hydroxyphenyl)-2-methylbutanal                                | 3-2-Mbuty        |    | 83.3 | NA   |
| 67 | picolinaldehyde                                                    | Pico             |     | 81.7 | NA   |
| 68 | piperidine-1-carbaldehyde                                          | Formylpiperidine |     | 73.3 | NA   |
| 69 | 2,4-dioxobutanoic acid                                             | 2,4-Dbuty        |     | 71.7 | NA   |
| 70 | phthalaldehyde                                                     | o-Phthal         |     | 70.0 | NA   |
| 71 | (E)-oct-2-enal7-aminoctanal                                        | 7-N-octe         |     | 68.3 | NA   |
| 72 | N-methyl-N-(3-oxopropyl)nitrous amide                              | N-N-nit          |     | 63.3 | NA   |
| 73 | cyclohexyl formate                                                 | Cyc-for          |    | 63.3 | NA   |
| 74 | ((3R,5S)-7-oxo-4-oxa-1-azabicyclo[3.2.0]heptan-3-yl)methyl formate | 7-oxo-4-1-Mfor   |   | 63.3 | NA   |
| 75 | 3,4-dihydroxybenzaldehyde                                          | D-H-ben          |   | 61.7 | NA   |
| 76 | (E)-7-methyl-6-methyleneoct-3-en-2-one                             | 6-Moct-3-en      |  | 61.7 | NA   |
| 77 | 2-amino-3-(1H-imidazol-5-yl)propanal                               | 2-N-5-pro        |   | 58.3 | NA   |
| 78 | cinnamaldehyde                                                     | Cin              |  | 55.0 | NA   |
| 79 | 9-nitrononanal                                                     | 9-nitnona        |  | 55.0 | NA   |
| 80 | 5-oxopentanoic acid                                                | 5-oxo            |   | 53.3 | NA   |
| 81 | 3-(dimethylamino)propanal                                          | 3-nbut           |   | 53.3 | NA   |
| 82 | 3-morpholinopropanal                                               | 3-pro            |   | 51.7 | NA   |
| 83 | 4-nitrooxepan-2-one                                                | 4-pan-2-one      |   | 51.7 | NA   |
| 84 | 4-methoxybenzaldehyde                                              | p-Anisaldehyde   |  | 51.7 | NA   |

|    |                                                                     |                  |                                                                                    |      |    |
|----|---------------------------------------------------------------------|------------------|------------------------------------------------------------------------------------|------|----|
| 85 | (2E,4E,6E)-7-hydroxy-4-methylhepta-2,4,6-trienal                    | 7-hy-4-M-trienal | 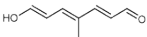 | 50.0 | NA |
| 86 | ((2E,4E,6Z)-5-ethyl-2-methylocta-2,4,6-trienal                      | 5-Et-2-M-trienal |   | 50.0 | NA |
| 87 | 5-oxooctanal                                                        | 5-tanal          |  | 50.0 | NA |
| 88 | (1R,5S)-2-methyl-5-(3-oxoprop-1-en-2-yl)cyclopentane-1-carbaldehyde | 2-M-5-1-carb     |   | 50.0 | NA |

\*NA: The occurrence of individual aldehyde is < 50.0%.

## 5. Exploring LCa potential features by using ML

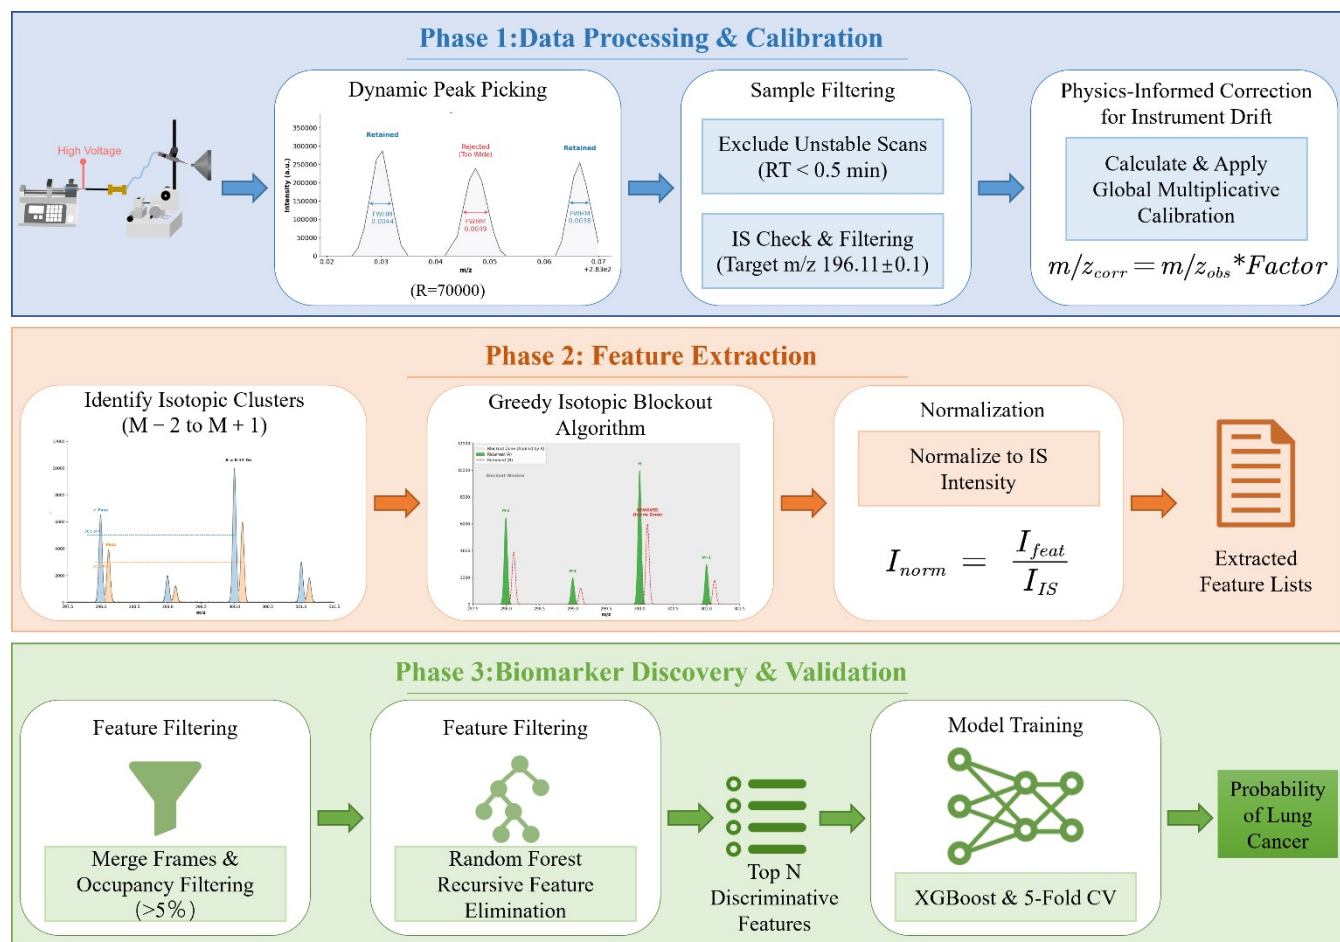

**Fig. S12** Overview of the physics-informed metabolomics analysis workflow. The pipeline consists of three main stages designed for high-precision biomarker discovery. Phase I: Data processing & Calibration. Raw mass spectrometry data undergo resolution-locked dynamic peak picking (R = 70,000), followed by global multiplicative calibration. An internal standard ( $m/z$  196.11) is used as a spectral reference to correct scan-level mass drift by deriving frame-specific scaling factors. Phase II: Feature extraction. Isotopic clusters (M-2 to M+1) are identified using a greedy isotopic blockout strategy within a 0.03 Da tolerance window. Features are normalized to the internal standard and filtered by occupancy (>5%) to suppress background signals. Phase III: Biomarker discovery & validation. High-dimensional features are screened using a Random Forest model. The selected feature set is then evaluated with ML (XGBoost model) classifier under stratified cross-validation to assess diagnostic performance.

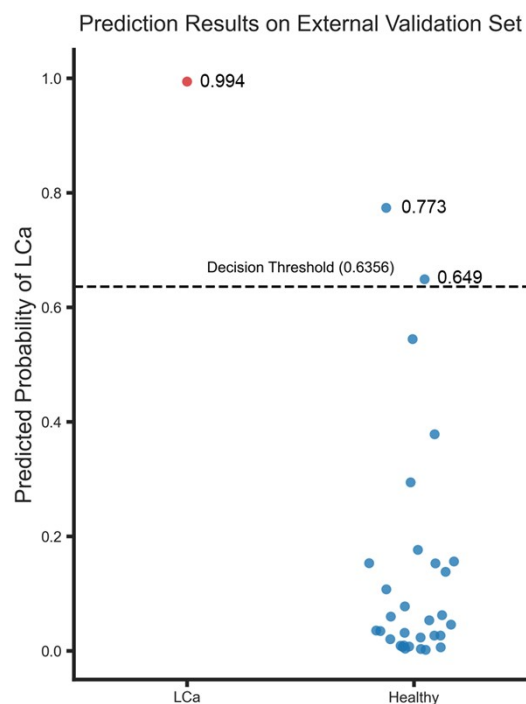

**Fig. S13** Prediction probability distribution of the XGBoost model on the external validation set. The y-axis represents the predicted probability of LCa, and the x-axis indicates the true clinical labels (1 LCa and 31 Healthy Controls). The dashed black line denotes the predefined decision threshold (0.636) derived from the 5-fold cross-validation phase. The single true LCa case (red dot) was successfully identified with high confidence (0.994). Among the healthy controls (blue dots), the vast majority were correctly classified with probabilities well below the threshold, with only two cases misclassified as false positives (FP; 0.773 and 0.649) marginally exceeding the threshold.

## 6. Quantitation of different aldehyde

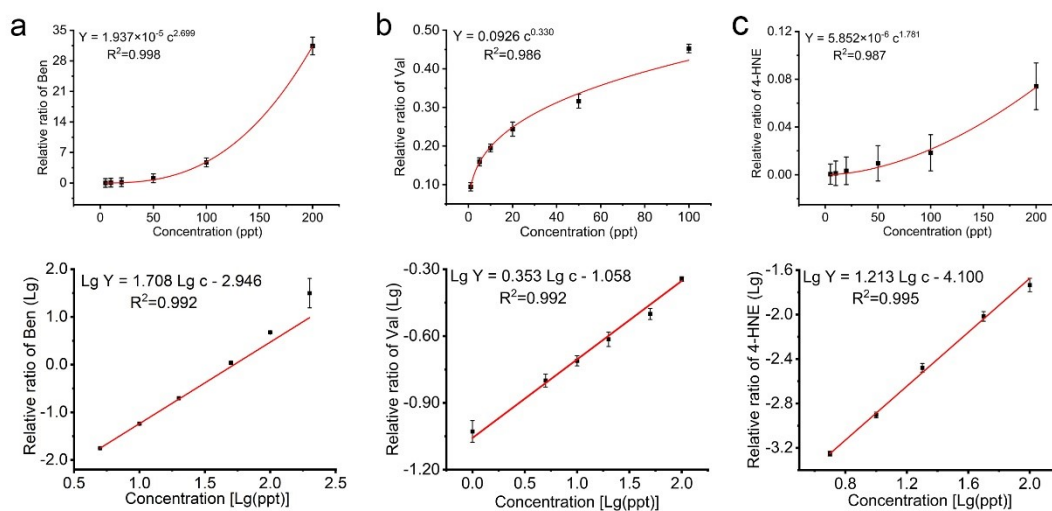

**Fig. S14** Calibration curves (up) and curves (down) of different aldehydes: (a) Ben, (b) Val and (c) 4-HNE.

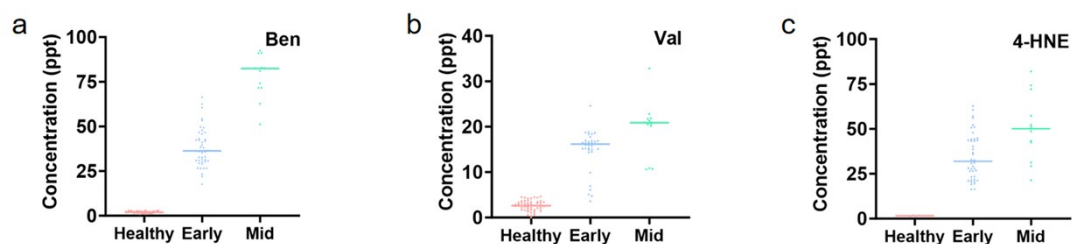

**Fig. S15** The respective concentrations of different aldehydes in healthy and LCa volunteers: (a) Ben, (b) Val and (c) 4-HNE.

## 7. Stability of “nano-filter” AIMS

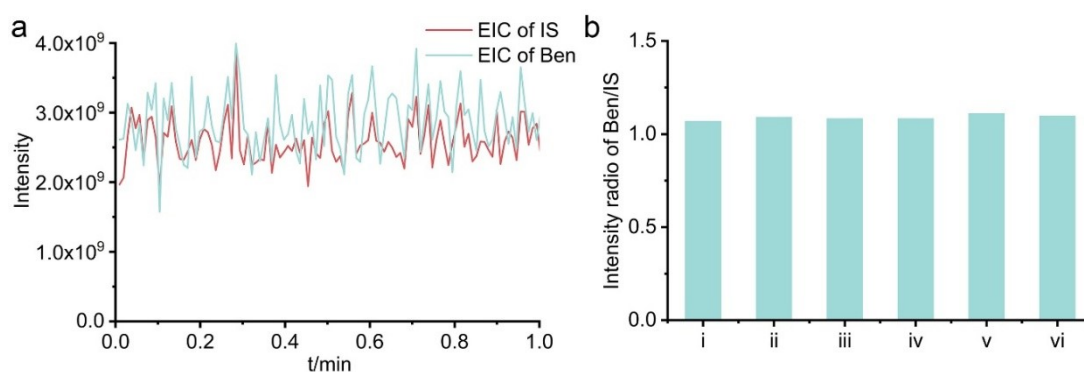

**Fig. S16** (a) EIC of the characteristic ion of Ben (blue,  $m/z$  305) and IS (red,  $m/z$  196). (b) MS peak area ratio of Ben to IS from six parallel tests.

## 8. Recovery tests of different aldehydes

Recovery tests were conducted by comparing the determined concentrations with the spiked standard aldehyde concentrations. As summarized in Table S2 - Table S4, the average recovery was in the range of 91.3% to 107% ( $RSD \leq 9.33\%$ ), indicating the considerably high reliability of this method.

**Table S2.** Recovery tests of Ben.

| Added<br>( $\mu\text{M}$ ) | Found<br>( $\mu\text{M}$ ) | Recovery | Average<br>recovery | RSD<br>( $n=6$ ) |
|----------------------------|----------------------------|----------|---------------------|------------------|
| 8.00                       | 7.41                       | 0.926    | 0.917               | 4.56%            |
|                            | 6.93                       | 0.866    |                     |                  |
|                            | 7.21                       | 0.901    |                     |                  |
|                            | 7.59                       | 0.949    |                     |                  |
|                            | 6.99                       | 0.874    |                     |                  |
|                            | 7.88                       | 0.985    |                     |                  |
| 15.0                       | 14.9                       | 0.993    | 0.944               | 4.91%            |
|                            | 13.7                       | 0.913    |                     |                  |
|                            | 14.8                       | 0.987    |                     |                  |
|                            | 14.7                       | 0.980    |                     |                  |
|                            | 13.8                       | 0.920    |                     |                  |
|                            | 13.1                       | 0.873    |                     |                  |
| 25.0                       | 25.5                       | 1.02     | 1.06                | 5.58%            |
|                            | 27.7                       | 1.11     |                     |                  |
|                            | 27.8                       | 1.11     |                     |                  |
|                            | 26.4                       | 1.06     |                     |                  |
|                            | 27.6                       | 1.10     |                     |                  |
|                            | 24.4                       | 0.976    |                     |                  |

**Table S3.** Recovery tests of Val.

| Added<br>( $\mu\text{M}$ ) | Found<br>( $\mu\text{M}$ ) | Recovery | Average<br>recovery | RSD<br>(n=6) |
|----------------------------|----------------------------|----------|---------------------|--------------|
| 8                          | 7.04                       | 0.880    | 0.913               | 5.14%        |
|                            | 6.77                       | 0.846    |                     |              |
|                            | 7.43                       | 0.929    |                     |              |
|                            | 7.32                       | 0.915    |                     |              |
|                            | 7.99                       | 0.999    |                     |              |
|                            | 7.25                       | 0.906    |                     |              |
| 15                         | 14.4                       | 0.960    | 0.921               | 6.37%        |
|                            | 13.1                       | 0.873    |                     |              |
|                            | 13.5                       | 0.900    |                     |              |
|                            | 14.3                       | 0.953    |                     |              |
|                            | 15.1                       | 1.01     |                     |              |
|                            | 12.5                       | 0.833    |                     |              |
| 25                         | 25.3                       | 1.01     | 1.065               | 7.43%        |
|                            | 27.4                       | 1.10     |                     |              |
|                            | 29.8                       | 1.19     |                     |              |
|                            | 24.5                       | 0.980    |                     |              |
|                            | 26.6                       | 1.06     |                     |              |
|                            | 26.1                       | 1.04     |                     |              |

**Table S4.** Recovery tests of 4-HNE.

| Added<br>( $\mu\text{M}$ ) | Found<br>( $\mu\text{M}$ ) | Recovery | Average<br>recovery | RSD<br>(n=6) |
|----------------------------|----------------------------|----------|---------------------|--------------|
| 8.00                       | 8.55                       | 1.07     | 1.02                | 9.33%        |
|                            | 7.99                       | 0.999    |                     |              |
|                            | 7.21                       | 0.901    |                     |              |
|                            | 9.41                       | 1.18     |                     |              |
|                            | 7.78                       | 0.973    |                     |              |
|                            | 8.14                       | 1.02     |                     |              |
| 15.0                       | 14.7                       | 0.980    | 0.942               | 4.06%        |
|                            | 14.1                       | 0.940    |                     |              |
|                            | 14.6                       | 0.973    |                     |              |
|                            | 14.5                       | 0.967    |                     |              |
|                            | 13.8                       | 0.920    |                     |              |
|                            | 13.1                       | 0.873    |                     |              |
| 25.0                       | 26.5                       | 1.06     | 1.03                | 6.39%        |
|                            | 27.1                       | 1.08     |                     |              |
|                            | 24.8                       | 0.992    |                     |              |
|                            | 27.4                       | 1.10     |                     |              |
|                            | 24.6                       | 0.984    |                     |              |
|                            | 23.4                       | 0.936    |                     |              |

### 9. Interference experiment and stability test

Gaseous Ben mixed with different SMMs (Cys, GSH or acetone) was detected by “nano-filter” AIMS. Compared with the gaseous Ben, these gaseous mixture solutions showed similar MS peak area ratio values ( $m/z$  305/196) for Ben.

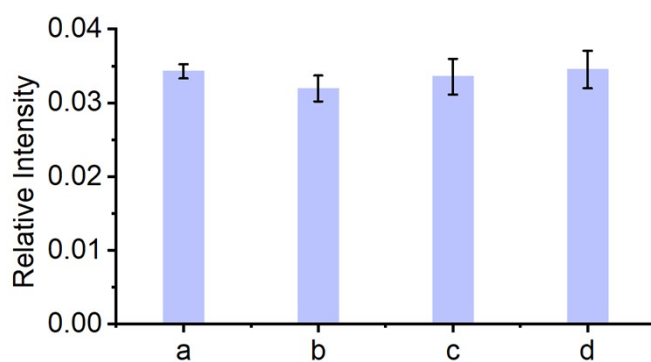

**Fig. S17** MS peak area ratio values of Ben (100 ppt) mixed with different SMMs (1 ppm): (a) Ben only; (b) Ben + Cys; (c) Ben + GSH and (d) Ben + acetone.

## References

- [1] A. C. Ruberte, D. Plano, I. Encio, C. Aydillo, A. K. Sharma, C. Sanmartin, *Eur J Med Chem* **2018**, *157*, 14-27.
- [2] Jun Dong, Hairong Zheng, Xuqiang Li, Xiaoqing Yan, Yu sun, Z. Zhang, *Applied Optics* **2011**, *50*, G123-G126.
- [3] Y. Yang, W. Wang, H. Liu, L. Tong, X. Mu, Z. Chen, B. Tang, *Angew Chem Int Ed Engl* **2022**, *61*, e202113051.
- [4] S. Zhang, Y. Yang, Y. Zhang, C. Chen, Z. Liang, D. Sun, X. Gao, Z. Yang, F. Zhang, *Journal of Materials Science & Technology* **2026**, *260*, 162-173.

## Author Contributions

Y.Y. and B.T. designed the experiments. Y.Y. and W.Q.W. performed the experiments and analyzed the data. T.Y., W.X.W., W.J.W. and Y.C. collected EB samples from Qilu hospital. Y.J. and J.M. collected EB samples from Shandong Provincial Hospital. Z. Z. and W. L. conducted the machine learning analysis. T.Y., Z.C. and Y.C. assisted with the experimental instrument support. Y.Y., W.Q.W. and B.T. wrote the manuscript.
